# Supplementary material for: Socio-Demographic Disparities in Gastric Adenocarcinoma: A Population-Based Study
Source: Cancers (Basel). 2020 Jan 9;12(1):157. doi: 10.3390/cancers12010157 (PMC7016781; doi:10.3390/cancers12010157)
Supplement: Supplementary file 1 [file cancers-12-00157-s001.pdf]

### Supplementary Tables:

**Supplementary Table 1:** Univariate Cox proportional hazards regression model highlighting OS in the gastric adenocarcinoma patient population

| Variable                                                               |                 | Hazard ratio | 95% Confidence Interval (CI) | p-value |
|------------------------------------------------------------------------|-----------------|--------------|------------------------------|---------|
| Grade (III/IV) vs. grade (I/II)                                        |                 | 1.43         | 1.40 – 1.45                  | <0.01   |
| Charlson Comorbidity Score ( $\geq 1$ vs. none)                        |                 | 1.11         | 1.09 – 1.13                  | <0.01   |
| Primary location (body + lesser/greater curvature vs. cardia + fundus) |                 | 1.32         | 1.27 – 1.38                  | <0.01   |
| Race                                                                   | Black vs. White | 1.03         | 1.01 – 1.06                  | <0.01   |
|                                                                        | Asian vs. White | 0.66         | 0.64 – 0.69                  | <0.01   |
| Female vs. male                                                        |                 | 1.05         | 1.03 – 1.07                  | <0.01   |
| Uninsured vs. insured                                                  |                 | 1.08         | 1.03 – 1.13                  | <0.01   |
| Rural vs. urban                                                        |                 | 1.08         | 1.05 – 1.10                  | <0.01   |

### Supplementary Figures:

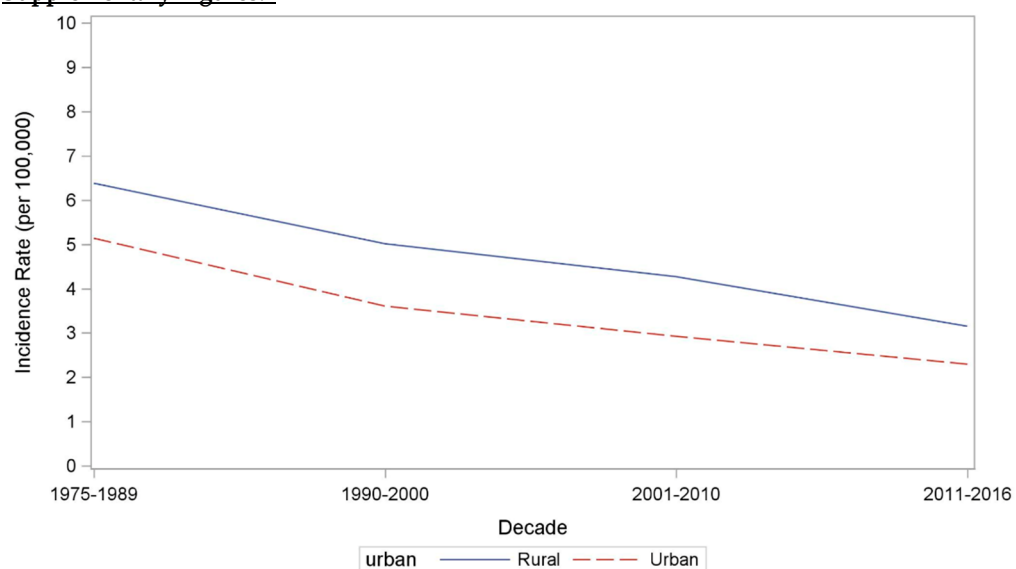

**Supplementary Figure 1:** Stomach adenocarcinoma incidence based on the SEER database from 1975 to 2016

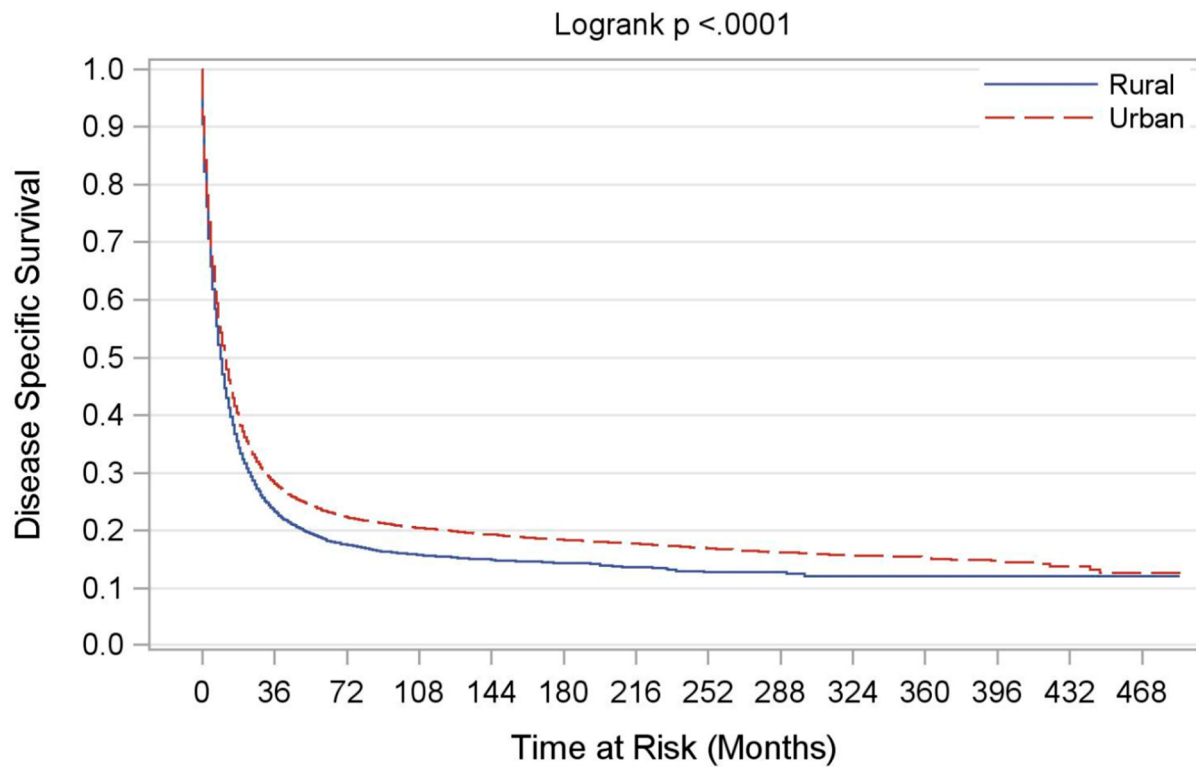

| Strata | 3-yr Surv.Rate<br>(95% CI) | 5-yr Surv.Rate<br>(95% CI) |
|--------|----------------------------|----------------------------|
| Total  | 0.28 (0.28, 0.28)          | 0.23 (0.23, 0.23)          |
| Rural  | 0.24 (0.23, 0.25)          | 0.19 (0.18, 0.20)          |
| Urban  | 0.28 (0.28, 0.29)          | 0.24 (0.23, 0.24)          |

**Supplementary Figure 2:** Disease-specific survival of gastric cancer patients using SEER database (from 1975 to 2015)
